# Supplementary figures and images for: Temporal and Spatial Influences of Environmental Factors on the Distribution of Mesopelagic organism in the North Atlantic Ocean
Source: Copernicus journal article supplement (doi:10.5194/egusphere-2024-2991), 2024-10-29

# Overview chart of journal content:

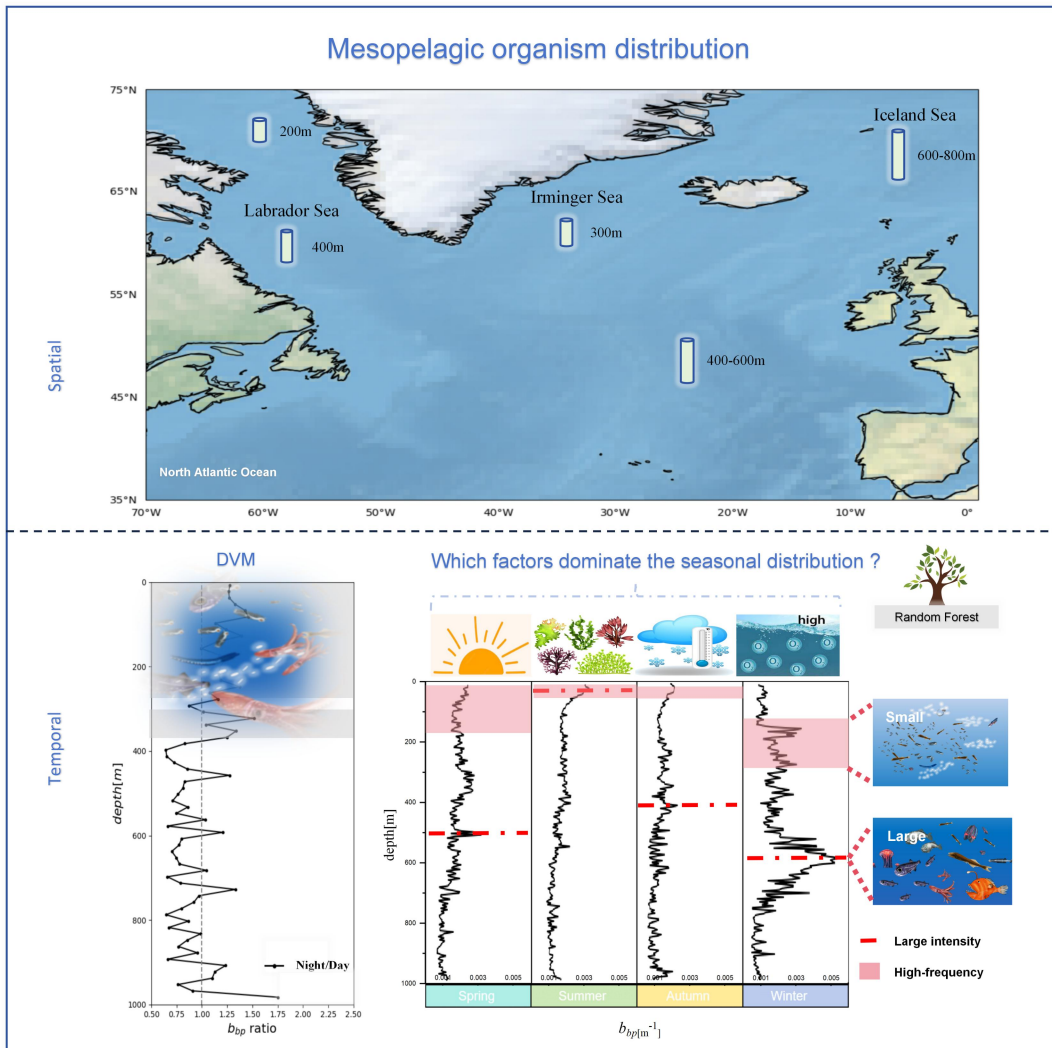

Supplement: Supplementary file 1 [file egusphere-2024-2991-supplement.pdf]
